# Supplementary material for: microRNA Expression of Renal Proximal Tubular Epithelial Cells and Their Extracellular Vesicles in an Inflammatory Microenvironment In Vitro
Source: MDPI journal article supplement (doi:10.3390/ijms241311069), 2023-07-04

**Suppl. Table S1: Regulated miRNAs in PTC.** The miRNAs and piRNAs with a minimum log2FC of >  $\pm 0.75$  and an adjusted p value (p-adj) of less than 0.1.

| Name              | Accession                  | Stimulation/Ctrl (log2FC) | p-adj |
|-------------------|----------------------------|---------------------------|-------|
| HSA-MIR-99B-5P    | MIMAT0038112               | 7,812                     | 0,001 |
| HSA-MIR-146A-3P   | MIMAT0004608               | 4,778                     | 0,000 |
| HSA-MIR-147B      | MIMAT0004928, MIMAT0037331 | 4,244                     | 0,000 |
| HSA-MIR-100-3P    | MIMAT0004512               | 4,051                     | 0,004 |
| HSA-MIR-146A-5P   | MIMAT0000449               | 3,384                     | 0,000 |
| HSA_PIR_020490    | DQ598167                   | 3,195                     | 0,010 |
| HSA_PIR_018573    | DQ595539                   | 3,151                     | 0,028 |
| HSA_PIR_020381    | DQ597997                   | 3,080                     | 0,017 |
| HSA_PIR_017936    | DQ594740                   | 2,966                     | 0,016 |
| HSA-MIR-125B-1-3P | MIMAT0004592               | 2,768                     | 0,089 |
| HSA-MIR-155-5P    | MIMAT0000646               | 2,438                     | 0,000 |
| HSA-MIR-1246      | MI0006381                  | 1,632                     | 0,089 |
| HSA_PIR_001312    | DQ571813                   | 1,132                     | 0,035 |
| HSA_PIR_020009    | DQ597484                   | -1,194                    | 0,099 |
| HSA_PIR_017033    | DQ593538                   | -1,490                    | 0,037 |
| HSA-MIR-140-3P    | MIMAT0004597               | -1,505                    | 0,016 |
| HSA-MIR-744-5P    | MIMAT0004945               | -1,711                    | 0,076 |
| HSA-MIR-335-5P    | MIMAT0000765               | -1,872                    | 0,006 |
| HSA-MIR-296-3P    | MIMAT0004679               | -2,027                    | 0,037 |
| HSA_PIR_020815    | DQ598651                   | -2,440                    | 0,007 |
| HSA-MIR-186-5P    | MIMAT0000456               | -8,608                    | 0,000 |
| HSA-MIR-210-3P    | MIMAT0000267               | -8,773                    | 0,000 |
| HSA-MIR-128-3P    | MIMAT0000424               | -9,909                    | 0,000 |

**Suppl. Table S2: Regulated miRNAs in EVs.** The miRNAs and piRNAs with a minimum log2FC of >  $\pm 0.75$  and an adjusted p value (p-adj) of less than 0.1.

| Name            | Accession                  | Stimulation/Ctrl (log2FC) | p-adj |
|-----------------|----------------------------|---------------------------|-------|
| HSA-MIR-147B    | MIMAT0004928, MIMAT0037331 | 3,007                     | 0,005 |
| HSA_PIR_014635  | DQ590029                   | 2,204                     | 0,080 |
| HSA-MIR-3613-5P | MIMAT0017990               | 2,163                     | 0,044 |
| HSA_PIR_019179  | DQ596327                   | 1,987                     | 0,084 |
| HSA_PIR_000805  | DQ571003                   | 1,973                     | 0,000 |
| HSA-MIR-146A-5P | MIMAT0000449               | 1,944                     | 0,000 |
| HSA_PIR_016659  | DQ592932                   | 1,815                     | 0,000 |
| HSA_PIR_016735  | DQ593039                   | 1,748                     | 0,000 |
| HSA_PIR_020381  | DQ597997                   | 1,659                     | 0,013 |
| HSA_PIR_016658  | DQ592931                   | 1,529                     | 0,000 |
| HSA-MIR-320C    | MIMAT0005793               | 1,336                     | 0,019 |
| HSA-MIR-155-5P  | MIMAT0000646               | 1,232                     | 0,000 |
| HSA-MIR-141-3P  | MIMAT0000432               | 1,025                     | 0,000 |

|                 |              |        |       |
|-----------------|--------------|--------|-------|
| HSA-MIR-23B-3P  | MIMAT0000418 | 0,954  | 0,001 |
| HSA-MIR-221-3P  | MIMAT0000278 | 0,801  | 0,000 |
| HSA-MIR-148A-3P | MIMAT0000243 | 0,764  | 0,084 |
| HSA_PIR_018570  | DQ595536     | -0,882 | 0,031 |
| HSA_PIR_009228  | DQ582496     | -0,883 | 0,026 |
| HSA_PIR_001312  | DQ571813     | -1,226 | 0,000 |
| HSA_PIR_004308  | DQ575882     | -1,259 | 0,091 |
| HSA_PIR_009981  | DQ583434     | -1,346 | 0,061 |
| HSA_PIR_006426  | DQ578783     | -1,378 | 0,001 |
| HSA_PIR_004307  | DQ575881     | -1,580 | 0,023 |
| HSA_PIR_017724  | DQ594465     | -1,661 | 0,000 |
| HSA_PIR_019951  | DQ597403     | -1,701 | 0,000 |
| HSA_PIR_020541  | DQ598252     | -1,736 | 0,011 |
| HSA_PIR_004801  | DQ576605     | -1,754 | 0,098 |
| HSA-MIR-143-3P  | MIMAT0000435 | -1,851 | 0,098 |
| HSA_PIR_020485  | DQ598159     | -1,946 | 0,001 |
| HSA_PIR_001318  | DQ571823     | -2,218 | 0,000 |
| HSA_PIR_020829  | DQ598677     | -2,256 | 0,000 |
| HSA_PIR_015026  | DQ590548     | -2,271 | 0,000 |
| HSA_PIR_020496  | DQ598175     | -2,357 | 0,000 |
| HSA_PIR_019420  | DQ596670     | -2,410 | 0,024 |
| HSA_PIR_019914  | DQ597347     | -2,534 | 0,000 |
| HSA_PIR_004153  | DQ575660     | -2,802 | 0,000 |
| HSA_PIR_017716  | DQ594453     | -2,872 | 0,000 |
| HSA_PIR_019752  | DQ597110     | -2,954 | 0,000 |
| HSA_PIR_017723  | DQ594464     | -3,023 | 0,011 |
| HSA_PIR_020497  | DQ598177     | -3,044 | 0,000 |
| HSA_PIR_000794  | DQ570992     | -3,156 | 0,002 |
| HSA_PIR_001311  | DQ571812     | -3,217 | 0,011 |
| HSA_PIR_020391  | DQ598016     | -3,431 | 0,000 |
| HSA_PIR_019825  | DQ597218     | -3,739 | 0,000 |
| HSA-MIR-3687    | MIMAT0018115 | -3,836 | 0,000 |
| HSA_PIR_020326  | DQ597916     | -3,888 | 0,000 |
| HSA_PIR_016677  | DQ592953     | -3,915 | 0,000 |
| HSA_PIR_000765  | DQ570956     | -4,118 | 0,000 |
| HSA_PIR_020499  | DQ598183     | -4,386 | 0,000 |
| HSA_PIR_011300  | DQ585261     | -4,789 | 0,000 |

**Suppl. Figure S1: KEGG-pathway analysis of the regulated miRNAs in PTC and EVs.** KEGG-pathway analysis of miR-146a-5p, miR-147b, and miR-155-5p based on the miRNA signature performed with miRNet (miRTarBase v8.0).

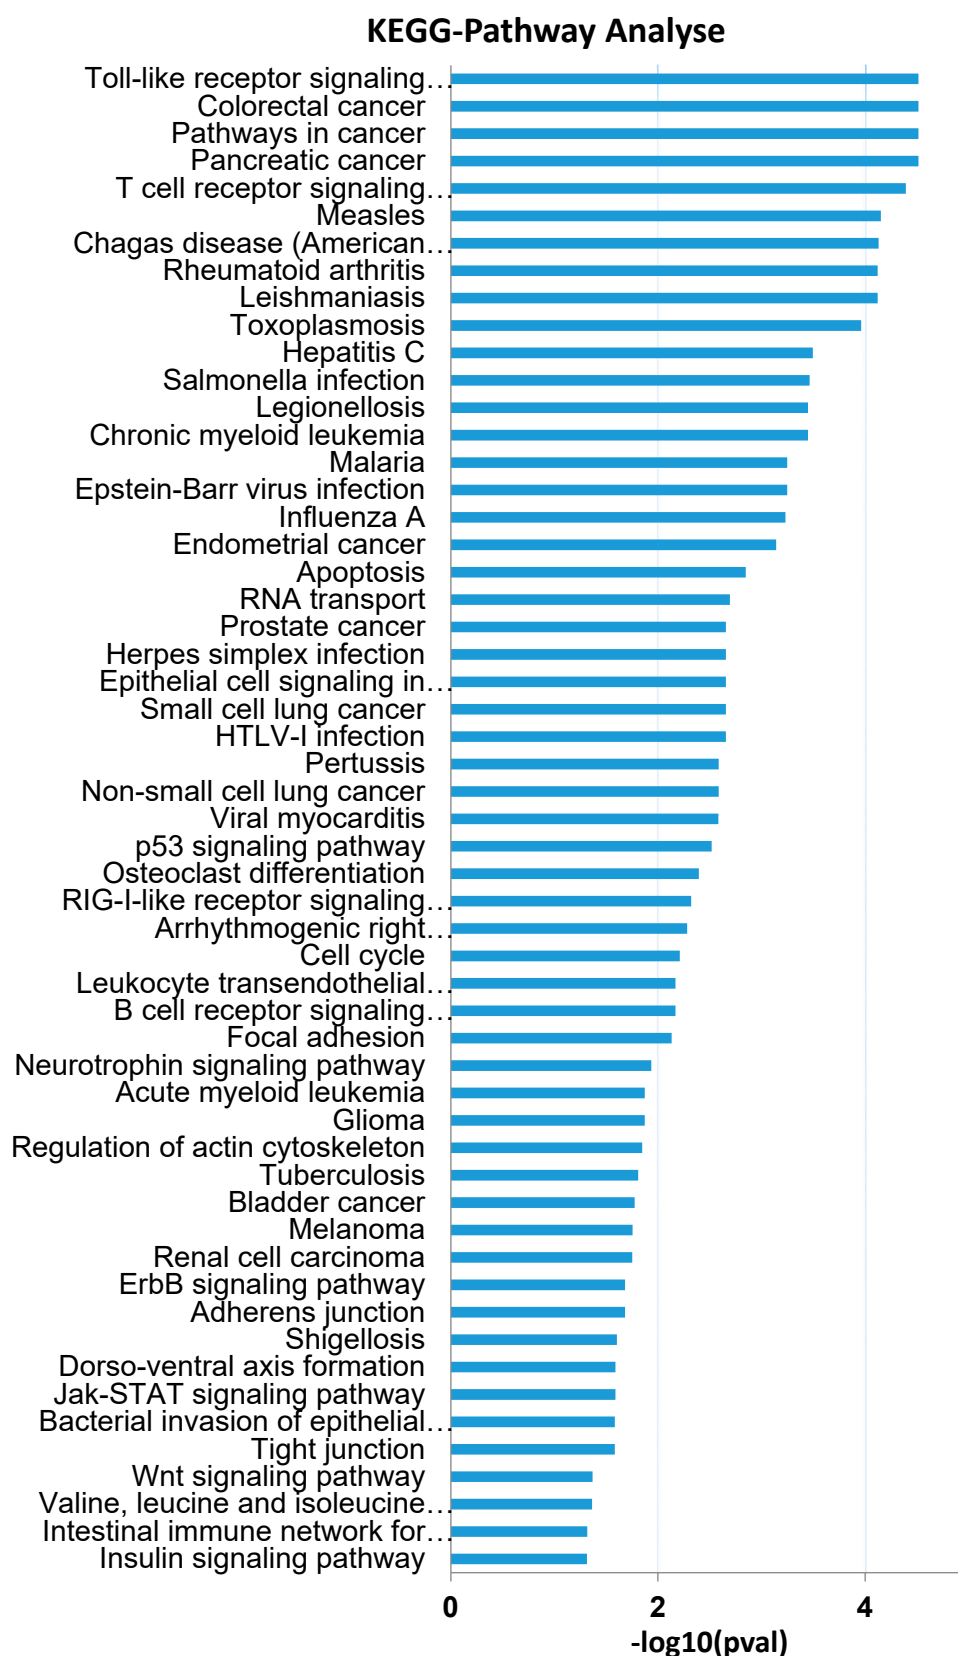

Supplement: s1 [file s1]
